# Supplementary material for: In Situ Sputtering Silver Induction Electrode for Stable and Stretchable Triboelectric Nanogenerators
Source: MDPI journal article supplement (doi:10.3390/mi12101267), 2021-10-18
Supplement: s1 [file s1]

**Supplementary Note S1:** The detailed procedures for TENG examination.

The detailed motion parameters controlled by a linear motor are as follows. The used positive triboelectric layer is PET, and the area of TENG is  $2 \times 2 \text{ cm}^2$ . The contact-separation distance is 10 mm, the acceleration of the movement is  $1000 \text{ mm/s}^2$ , and the wait time of contact is 0.1s.

**Supplementary Figures:**

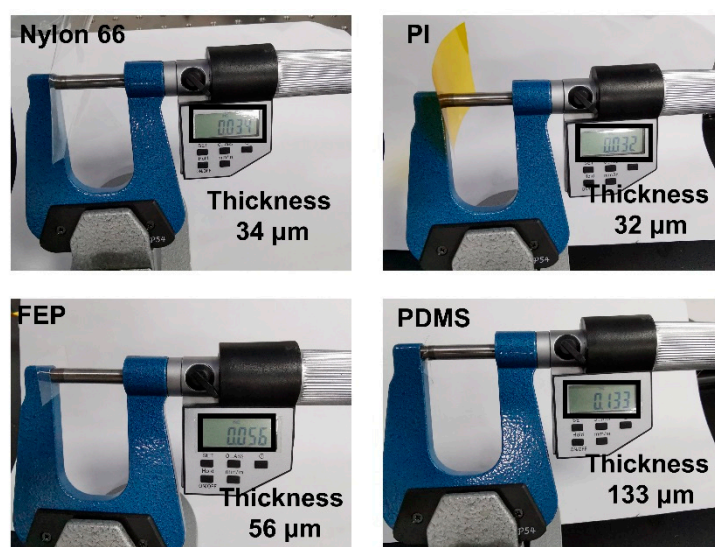

**Figure S1.** The thickness of the polymer films (nylon 66, PI, FEP, and PDMS) used in this work.

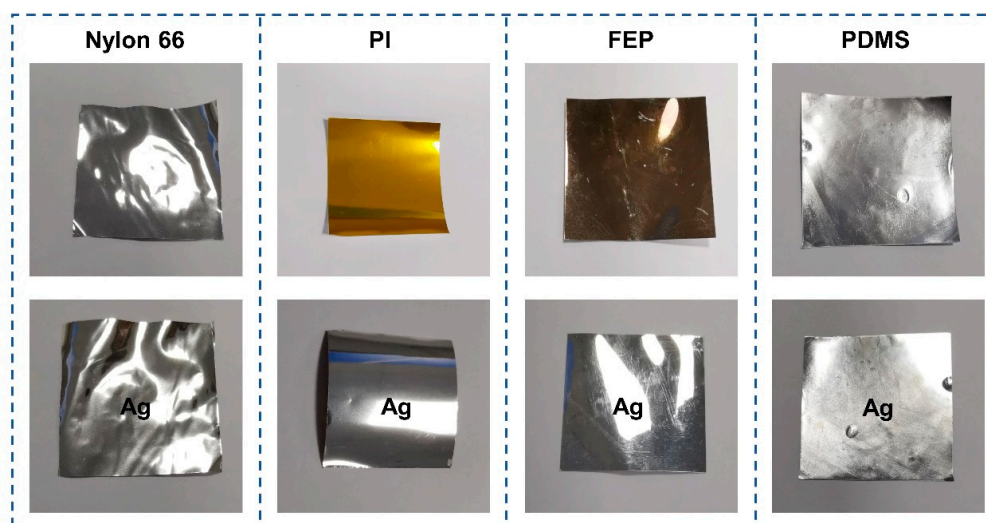

**Figure S2.** The optical images of the polymer films after Ag sputtering.

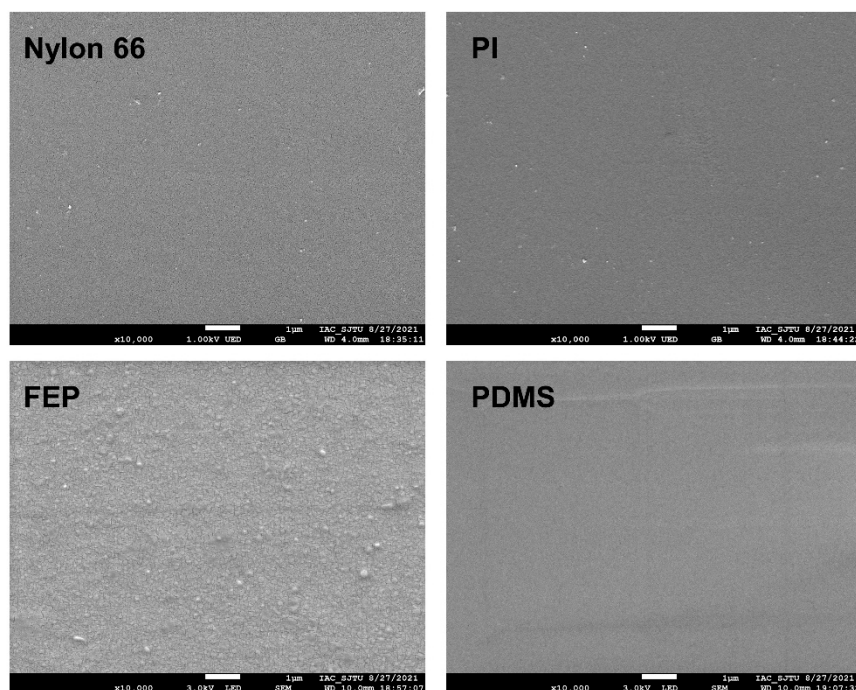

**Figure S3.** The SEM images of the polymer films (nylon 66, PI, FEP, and PDMS) at  $\times 10$  K magnification.

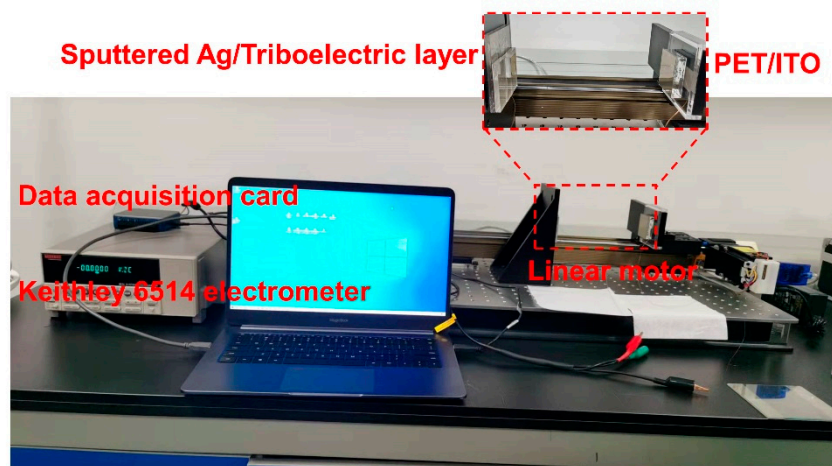

**Figure S4.** The testing system, including a Keithley 6514 electrometer, data acquisition card, linear motor, and TENG.

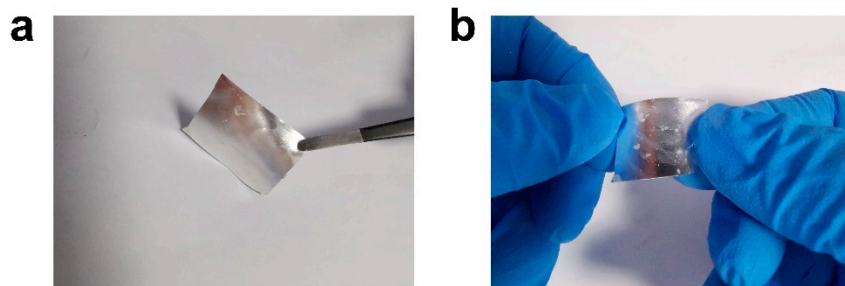

**Figure S5.** The optical images of the sputtered Ag after severe deformation.
